# Supplementary material for: Consensus-Derived Quality Performance Indicators for Neuroendocrine Tumour Care
Source: MDPI journal article supplement (doi:10.3390/jcm8091455), 2019-09-12
Supplement: s1 [file s1]

# Consensus-derived quality performance indicators for neuroendocrine tumour care

## Supplementary Material

### Supplementary Material 1: Literature Search

Pubmed, Medline (Ovid), Embase and Scopus were searched for key terms as follows.

Pubmed: ("performance indicator" OR "quality indicator" OR "quality of care" OR "quality assurance" OR "quality-related process") AND (neuroendocrine OR carcinoid) which reported 22 records, all of which were excluded.

Medline (ovid): ((Carcinoma, Neuroendocrine/ or Neuroendocrine Tumors/) OR (carcinoid.mp. or Carcinoid Tumor/)) AND (Quality Assurance, Health Care/ or Quality Indicators, Health Care/ or quality indicator.mp. or "Quality of Health Care"/) which reported 10 records, all of which were excluded.

Embase: (health care quality/ or quality indicator.mp. OR quality control/) AND (neuroendocrine tumor/ or gastroenteropancreatic neuroendocrine tumor/ OR neuroendocrine tumor.mp. OR carcinoid/ or stomach carcinoid/ or bronchus carcinoid/ or gastrointestinal carcinoid/ ) which reported 206 records, all of which were excluded.

Scopus: ( TITLE-ABS-KEY ( "neuroendocrine tumor" ) OR TITLE-ABS-KEY ( carcinoid) OR TITLE-ABS-KEY ( neuroendocrine AND tumour ) OR TITLE-ABS-KEY ( neuroendocrine AND carcinoma ) AND TITLE-ABS-KEY ( quality AND indicator ) OR TITLE-ABS-KEY ( quality AND improvement) OR TITLE-ABS-KEY ( quality AND care ) OR TITLE-ABS- KEY ( quality AND indicator ) which reported 470 records, all of which were excluded.

## Supplementary Material 2: Participants

**Supplementary Table 2.1.** 'Round 0' participants.

| Specialty                | Country   |             |        | Total |
|--------------------------|-----------|-------------|--------|-------|
|                          | Australia | New Zealand | Canada |       |
| Endocrinology            | 2         | 2           | 0      | 4     |
| Medical Oncology         | 7         | 1           | 10     | 18    |
| Nuclear Medicine         | 3         | 0           | 2      | 5     |
| Nurse                    | 0         | 1           | 0      | 1     |
| Pathology                | 0         | 0           | 2      | 2     |
| Patient/Patient Advocate | 2         | 0           | 1      | 3     |
| Pharmacist               | 0         | 0           | 1      | 1     |
| Radiation Oncology       | 0         | 0           | 1      | 1     |
| Radiology                | 0         | 1           | 0      | 1     |
| Researcher               | 1         | 1           | 3      | 5     |
| Surgery                  | 0         | 2           | 3      | 5     |

**Supplementary Table 2.2.** 'Round 1' participants.

The Round 1 survey was sent to 237 people (CommNETs members n=147; NZ NET multidisciplinary meeting list n=78; and NZ Ministry of Health Cancer Services n=12).

Participants who completed the survey are presented in the table below. Two participants selected multiple specialties in Round 1: Patient/patient advocate/Doctor and Doctor/Researcher. A single specialty is presented for each participant based on the following prioritisation hierarchy: patient/patient advocate, doctor, nurse, researcher, health policy.

| Specialty                | Country   |             |        | Total |
|--------------------------|-----------|-------------|--------|-------|
|                          | Australia | New Zealand | Canada |       |
| Doctor                   | 26        | 19          | 15     | 60    |
| Nurse                    | 1         | 1           |        | 2     |
| Researcher               |           | 2           |        | 2     |
| Patient/patient advocate | 2         | 2           | 1      | 5     |
| Health Policy            |           | 2           |        | 2     |

**Supplementary Table 2.3.** 'Round 2' expert working group.

| Specialty          | Country   |             |        | Total |
|--------------------|-----------|-------------|--------|-------|
|                    | Australia | New Zealand | Canada |       |
| Pathologist        |           | 1           |        | 1     |
| Surgeon            |           | 1           |        | 1     |
| Nuclear Medicine   | 2         |             |        | 2     |
| Medical Oncologist | 5         | 2           | 3      | 10    |
| Nurse              | 1         |             |        | 1     |
| Researcher         |           | 1           |        | 1     |
| Patient advocate   |           | 1           |        | 1     |

## Supplementary Material 3: 'Round 0' methodology

### *Candidate indicator generation*

For each question, participants generated and wrote down candidates in silence. Then each participant stated their idea to their group, and this was transcribed verbatim by the group facilitator onto a large flipchart, without question or discussion. One idea was shared from each person, continuously circling the group until there were no further ideas. Any new ideas generated by this process were also written verbatim. Then the facilitator led group discussion of each candidate. The wording of each candidate was altered only if recommended by the person who generated the idea. Then the flip chart was placed on a wall, and each group member attached a sticker to select the top five candidates from the work of their group. The five indicators from each group with the most stickers were selected to take forward into the Delphi consensus process.

### *Candidate indicator curation*

Candidates related to the same aspect of the patient journey were organised to create appropriateness statements using a hierarchical structure; a parent statement referred to the major concept (e.g., Survival after diagnosis ... ..), sometimes followed by sub-statements that further defined the parent statement in a checkbox format (e.g., ... .. Overall survival, Disease-free survival, Disease control rate, Progression free survival"; and then for this example a further set of checkboxes ... .. at 1 year, 2 years, 3 years, 4 years, 5 years, 6 years, 7 years, 8 years, 9 years, 10 years from diagnosis). The sub-statements were always descriptors of the parent appropriateness statement, so if the parent statement was not rated as important or measurable, then neither were the accompanying sub-statements. The sub-statements aimed to encourage direct comparison and to reduce the time taken to complete the Round 1 survey. In some cases, a parent statement was created de novo to improve the structure of the questionnaire (e.g., Measurement of quality of life...) to allow grouping of similar sub-statements that could be compared using checkboxes (e.g., Which of the following measures of quality of life ... .. Quality of life measured at diagnosis, Performance status measured at diagnosis, Quality of life monitoring, Regular assessment of symptom control). After this curation, appropriateness statements and sub-statements were taken forward to Round 1 for rating (see Figure 1 and Supplementary Material 4).

## Supplementary Material 4: 'Round 1' Online Survey

### *Online Survey*

Survey Monkey® was used to present appropriateness statements and record ratings and feedback. The first page collected information about the participant. An introductory page included links to short descriptions of the background, method, and instructions. A glossary was provided by hyperlink from the first time a defined word was used in the survey. The order of appropriateness statements was similar to the chronology of the patient journey. Similar indicators were grouped on the same page. Participants separately rated the *importance* of each statement, and the *measurability* of each statement.

The survey was sent to all CommNETs members; NZ NET multidisciplinary meeting list; and NZ Ministry of Health Cancer Services (Supplementary Material 2). Some participants forwarded the survey link to their own NET clinical communities. From the time the initial survey invitation was circulated, each person received at least two email reminders before closure of the survey.

Below are the statements as presented in the 'Round 1' survey.

| Statement number | Statement                                                                                                                   | Answer options for sub-statements (checkbox format) |
|------------------|-----------------------------------------------------------------------------------------------------------------------------|-----------------------------------------------------|
| 1                | Country (required)                                                                                                          |                                                     |
| 2                | State/Province (required)                                                                                                   |                                                     |
| 3                | Primary Professional Role (required)                                                                                        | Doctor                                              |
|                  |                                                                                                                             | Nurse                                               |
|                  |                                                                                                                             | Another clinical role                               |
|                  |                                                                                                                             | Researcher                                          |
|                  |                                                                                                                             | Patient/Patient advocate                            |
|                  |                                                                                                                             | Health Policy                                       |
|                  |                                                                                                                             | Other (please specify)                              |
| 4                | Name (preferred, but optional)                                                                                              |                                                     |
| 5                | Email Address (preferred, but optional)                                                                                     |                                                     |
| 6                | NET primary site is required to robustly interpret each indicator of NET care quality                                       |                                                     |
| 7                | NET tumour stage is required to robustly interpret each indicator of NET care quality                                       |                                                     |
| 8                | NET tumour grade is required to robustly interpret each indicator of NET care quality                                       |                                                     |
| 9                | Do you have any additional comments? (not required)                                                                         |                                                     |
| 10               | Survival after diagnosis is an important and measurable indicator of NET care quality                                       |                                                     |
| 11               | Which measures of survival are the most important indicators of NET care quality? Please choose two.                        | Overall survival                                    |
|                  |                                                                                                                             | Disease-free survival                               |
|                  |                                                                                                                             | Disease control rate                                |
|                  |                                                                                                                             | Progression free survival                           |
| 12               | Which measures of survival are the most measurable indicators of NET care quality? Please choose two.                       | Overall survival                                    |
|                  |                                                                                                                             | Disease-free survival                               |
|                  |                                                                                                                             | Disease control rate                                |
|                  |                                                                                                                             | Progression free survival                           |
| 13               | Which time points are most appropriate to measure survival? Please choose three.                                            | 1 year from diagnosis                               |
|                  |                                                                                                                             | 2 years from diagnosis                              |
|                  |                                                                                                                             | 3 years from diagnosis                              |
|                  |                                                                                                                             | 4 years from diagnosis                              |
|                  |                                                                                                                             | 5 years from diagnosis                              |
|                  |                                                                                                                             | 6 years from diagnosis                              |
|                  |                                                                                                                             | 7 years from diagnosis                              |
|                  |                                                                                                                             | 8 years from diagnosis                              |
|                  |                                                                                                                             | 9 years from diagnosis                              |
|                  |                                                                                                                             | 10 years from diagnosis                             |
|                  |                                                                                                                             | 15 years from diagnosis                             |
|                  |                                                                                                                             | 20 years from diagnosis                             |
| 14               | Documentation of cause of death for patients who die from NETs is an important and measurable indicator of NET care quality |                                                     |
| 15               | Do you have any additional comments? (not required)                                                                         |                                                     |
| 16               | Patient reported quality of life is an important and measurable indicator of NET care quality                               |                                                     |

|    |                                                                                                                                                                             |                                                             |
|----|-----------------------------------------------------------------------------------------------------------------------------------------------------------------------------|-------------------------------------------------------------|
| 17 | Which aspects of patient reported quality of life are the most important indicators of NET care quality? Please choose three.                                               | Physical wellbeing                                          |
|    |                                                                                                                                                                             | Financial toxicity                                          |
|    |                                                                                                                                                                             | Emotional wellbeing                                         |
|    |                                                                                                                                                                             | Functional status                                           |
|    |                                                                                                                                                                             | Symptoms                                                    |
|    |                                                                                                                                                                             | Satisfaction of care                                        |
|    |                                                                                                                                                                             | Disability                                                  |
|    |                                                                                                                                                                             | Edmonton Symptom Assessment Scale monitoring                |
|    |                                                                                                                                                                             | Patient reported outcome monitoring                         |
|    |                                                                                                                                                                             | Toxicity of treatment measured by patient reported outcomes |
| 18 | Which aspects of patient reported quality of life are the most measurable indicators of NET care quality? Please choose three.                                              | Physical wellbeing                                          |
|    |                                                                                                                                                                             | Financial toxicity                                          |
|    |                                                                                                                                                                             | Emotional wellbeing                                         |
|    |                                                                                                                                                                             | Functional status                                           |
|    |                                                                                                                                                                             | Symptoms                                                    |
|    |                                                                                                                                                                             | Satisfaction of care                                        |
|    |                                                                                                                                                                             | Disability                                                  |
|    |                                                                                                                                                                             | Edmonton Symptom Assessment Scale monitoring                |
|    |                                                                                                                                                                             | Patient reported outcome monitoring                         |
|    |                                                                                                                                                                             | Toxicity of treatment measured by patient reported outcomes |
| 19 | Do you have any additional comments? (not required)                                                                                                                         |                                                             |
| 20 | Surrogates for quality of life are important and measurable indicators of NET care quality                                                                                  |                                                             |
| 21 | Which of the following surrogates for quality of life is the most important indicator of NET care quality? Please choose one.                                               | ED attendance                                               |
|    |                                                                                                                                                                             | Hospital admission                                          |
|    |                                                                                                                                                                             | Unplanned hospital admissions                               |
| 22 | Which of the following surrogates for quality of life is the most measurable indicator of NET care quality? Please choose one.                                              | ED attendance                                               |
|    |                                                                                                                                                                             | Hospital admission                                          |
|    |                                                                                                                                                                             | Unplanned hospital admissions                               |
| 23 | Which time points are the most appropriate to measure quality of life (including patient reported quality of life and surrogates for quality of life)? Please choose three. | At diagnosis                                                |
|    |                                                                                                                                                                             | 1 year from diagnosis                                       |
|    |                                                                                                                                                                             | 2 years from diagnosis                                      |
|    |                                                                                                                                                                             | 3 years from diagnosis                                      |
|    |                                                                                                                                                                             | 4 years from diagnosis                                      |
|    |                                                                                                                                                                             | 5 years from diagnosis                                      |
|    |                                                                                                                                                                             | 6 years from diagnosis                                      |
|    |                                                                                                                                                                             | 7 years from diagnosis                                      |
|    |                                                                                                                                                                             | 8 years from diagnosis                                      |
|    |                                                                                                                                                                             | 9 years from diagnosis                                      |
|    |                                                                                                                                                                             | 10 years from diagnosis                                     |
|    |                                                                                                                                                                             | 15 years from diagnosis                                     |
|    |                                                                                                                                                                             | 20 years from diagnosis                                     |

|    |                                                                                                                                                                   |                                                                                           |
|----|-------------------------------------------------------------------------------------------------------------------------------------------------------------------|-------------------------------------------------------------------------------------------|
| 24 | Do you have any additional comments? (not required)                                                                                                               |                                                                                           |
| 25 | Measurement of quality of life is an important and measurable indicator of NET care quality                                                                       |                                                                                           |
| 26 | Which of the following measures of quality of life are the most important indicators of NET care quality? Please choose two.                                      | Quality of life measured at diagnosis                                                     |
|    |                                                                                                                                                                   | Performance status measured at diagnosis (e.g. ECOG performance score or Karnofsky score) |
|    |                                                                                                                                                                   | Quality of life monitoring                                                                |
|    |                                                                                                                                                                   | Regular assessment of symptom control                                                     |
| 27 | Which of the following measures of quality of life are the most measurable indicators of NET care quality? Please choose two.                                     | Quality of life measured at diagnosis                                                     |
|    |                                                                                                                                                                   | Performance status measured at diagnosis (e.g. ECOG performance score or Karnofsky score) |
|    |                                                                                                                                                                   | Quality of life monitoring                                                                |
|    |                                                                                                                                                                   | Regular assessment of symptom control                                                     |
| 28 | Proportion of patients who report they are NET symptom-free at 18 months using symptom questionnaire is an important and measurable indicator of NET care quality |                                                                                           |
| 29 | Proportion of patients with functional symptom control is an important and measurable indicator of NET care quality                                               |                                                                                           |
| 30 | Proportion of patients with non-functional symptom control is an important and measurable indicator of NET care quality                                           |                                                                                           |
| 31 | Do you have any additional comments? (not required)                                                                                                               |                                                                                           |
| 32 | Proportion of NET patients diagnosed with carcinoid heart disease (using echocardiogram) is an important and measurable indicator of NET care quality             |                                                                                           |
| 33 | Proportion of carcinoid patients who have cardiac imaging is an important and measurable indicator of NET care quality                                            |                                                                                           |
| 34 | Which time points are the most appropriate to look for carcinoid heart disease? Please choose three.                                                              | At diagnosis                                                                              |
|    |                                                                                                                                                                   | 1 year from diagnosis                                                                     |
|    |                                                                                                                                                                   | 2 years from diagnosis                                                                    |
|    |                                                                                                                                                                   | 3 years from diagnosis                                                                    |
|    |                                                                                                                                                                   | 4 years from diagnosis                                                                    |
|    |                                                                                                                                                                   | 5 years from diagnosis                                                                    |
|    |                                                                                                                                                                   | 6 years from diagnosis                                                                    |
|    |                                                                                                                                                                   | 7 years from diagnosis                                                                    |
|    |                                                                                                                                                                   | 8 years from diagnosis                                                                    |
|    |                                                                                                                                                                   | 9 years from diagnosis                                                                    |
|    |                                                                                                                                                                   | 10 years from diagnosis                                                                   |
|    |                                                                                                                                                                   | 15 years from diagnosis                                                                   |
|    |                                                                                                                                                                   | 20 years from diagnosis                                                                   |
| 35 | Do you have any additional comments? (not required)                                                                                                               |                                                                                           |
| 36 | Proportion of patients receiving a needs assessment is an important and measurable indicator of NET care quality                                                  |                                                                                           |
| 37 | Proportion of patients receiving a care plan is an important and measurable indicator of NET care quality                                                         |                                                                                           |
| 38 | Proportion of patients receiving a treatment summary is an important and measurable indicator of NET care quality                                                 |                                                                                           |
| 39 | Proportion of patients offered allied health services is an important and measurable indicator of NET care quality                                                |                                                                                           |

|    |                                                                                                                                                   |                                                       |
|----|---------------------------------------------------------------------------------------------------------------------------------------------------|-------------------------------------------------------|
| 40 | Proportion of patients offered patient support groups is an important and measurable indicator of NET care quality                                |                                                       |
| 41 | Do you have any additional comments? (not required)                                                                                               |                                                       |
| 42 | The time interval until treatment is started is an important and measurable indicator of NET care quality                                         |                                                       |
| 43 | Which of the following time intervals, are the most important indicators of NET care quality? Please choose two.                                  | Time from diagnosis to first treatment                |
|    |                                                                                                                                                   | Time from diagnosis to treatment plan                 |
|    |                                                                                                                                                   | Time from diagnosis to decision to treat              |
|    |                                                                                                                                                   | Time from decision to treat to definitive treatment   |
| 44 | Which of the following time intervals, are the most measurable indicators of NET care quality? Please choose two.                                 | Time from diagnosis to first treatment                |
|    |                                                                                                                                                   | Time from diagnosis to treatment plan                 |
|    |                                                                                                                                                   | Time from diagnosis to decision to treat              |
|    |                                                                                                                                                   | Time from decision to treat to definitive treatment   |
| 45 | The time interval from first doctors visit with symptoms of NET, to diagnosis of NET is an important and measurable indicator of NET care quality |                                                       |
| 46 | Which of the following time intervals are the most important indicators of NET care quality? Please choose three.                                 | Time from presentation to NET diagnosis               |
|    |                                                                                                                                                   | Time from presentation to any specialist referral     |
|    |                                                                                                                                                   | Time from presentation to NET specialist referral     |
|    |                                                                                                                                                   | Time from symptoms to NET diagnosis                   |
|    |                                                                                                                                                   | Time from initial symptoms to any specialist referral |
|    |                                                                                                                                                   | Time with "symptoms misdiagnosis"                     |
|    |                                                                                                                                                   | Number of GP visits                                   |
|    |                                                                                                                                                   | Number of health assessments                          |
|    |                                                                                                                                                   | Number of medical contacts                            |
|    |                                                                                                                                                   | Other (please specify)                                |
| 47 | Which of the following time intervals are the most measurable indicators of NET care quality? Please choose three.                                | Time from presentation to NET diagnosis               |
|    |                                                                                                                                                   | Time from presentation to any specialist referral     |
|    |                                                                                                                                                   | Time from presentation to NET specialist referral     |
|    |                                                                                                                                                   | Time from symptoms to NET diagnosis                   |
|    |                                                                                                                                                   | Time from initial symptoms to any specialist referral |
|    |                                                                                                                                                   | Time with "symptoms misdiagnosis"                     |
|    |                                                                                                                                                   | Number of GP visits                                   |
|    |                                                                                                                                                   | Number of health assessments                          |
|    |                                                                                                                                                   | Number of medical contacts                            |
| 48 | Do you have any additional comments? (not required)                                                                                               |                                                       |
| 49 | Proportion of patients with surgical consultation for consideration of resection is an important and measurable indicator of NET care quality     |                                                       |
| 50 | Proportion of patients getting resection is an important and measurable indicator of NET care quality                                             |                                                       |
| 51 | Proportion of patients who receive surgery with curative intent is an important and measurable indicator of NET care quality                      |                                                       |
| 52 | Proportion patients who receive non-curative surgery is an important and measurable indicator of NET care quality                                 |                                                       |
| 53 | Do you have any additional comments? (not required)                                                                                               |                                                       |



|    |                                                                                                                                             |                                                                      |
|----|---------------------------------------------------------------------------------------------------------------------------------------------|----------------------------------------------------------------------|
| 54 | Assessment of surgical quality is an important and measurable indicator of NET care quality                                                 |                                                                      |
| 55 | Which of the following measures of surgical quality are the most important indicators of NET care quality? Please choose two.               | Median length of stay following primary resection                    |
|    |                                                                                                                                             | Median length of stay following metastatic resection                 |
|    |                                                                                                                                             | Mortality at 30 days after surgery                                   |
|    |                                                                                                                                             | Mortality at 90 days after surgery                                   |
| 56 | Which of the following measures of surgical quality are the most measurable indicators of NET care quality? Please choose two.              | Median length of stay following primary resection                    |
|    |                                                                                                                                             | Median length of stay following metastatic resection                 |
|    |                                                                                                                                             | Mortality at 30 days after surgery                                   |
|    |                                                                                                                                             | Mortality at 90 days after surgery                                   |
| 57 | The quality of pre-operative assessment is an important and measurable indicator of NET care quality                                        |                                                                      |
| 58 | Which pre-operative assessment is the most important indicator of NET care quality? Please choose one.                                      | Appropriate clinical assessment                                      |
|    |                                                                                                                                             | Appropriate functional assessment                                    |
|    |                                                                                                                                             | Appropriate radiological assessment                                  |
| 59 | Which pre-operative assessment is the most measurable indicator of NET care quality? Please choose one.                                     | Appropriate clinical assessment                                      |
|    |                                                                                                                                             | Appropriate functional assessment                                    |
|    |                                                                                                                                             | Appropriate radiological assessment                                  |
| 60 | Complete pre-operative TNM staging is an important and measurable indicator of NET care quality                                             |                                                                      |
| 61 | Complete post-operative TNM staging is an important and measurable indicator of NET care quality                                            |                                                                      |
| 62 | Do you have any additional comments? (not required)                                                                                         |                                                                      |
| 63 | Proportion of patients who see who see a NET specialist is an important and measurable indicator of NET care quality                        |                                                                      |
| 64 | Review by specialist (by any means including virtual review) at least annually is an important and measurable indicator of NET care quality |                                                                      |
| 65 | MDM review is an important and measurable indicator of NET care quality                                                                     |                                                                      |
| 66 | Which of the following measures of multidisciplinary care are the most important indicators of NET care quality? Please choose three.       | Proportion of cases discussed at MDM                                 |
|    |                                                                                                                                             | Proportion patients who are discussed at MDM at diagnosis            |
|    |                                                                                                                                             | Evaluation in a multi-disciplinary clinic prior to first treatment   |
|    |                                                                                                                                             | Evaluation in a MDM prior to first treatment                         |
|    |                                                                                                                                             | Case discussed at MDM that include a diagnostic radiologist          |
|    |                                                                                                                                             | MDM issued grade and stage statement (TNM)                           |
|    |                                                                                                                                             | Clear documentation of MDM discussion with all stakeholders          |
|    |                                                                                                                                             | Communication of tumour board consensus                              |
|    |                                                                                                                                             | Proportion patients who are discussed at MDM with any new recurrence |
| 67 | Which of the following measures of multidisciplinary care are the most measurable indicators of NET care quality? Please choose three.      | Proportion of cases discussed at MDM                                 |
|    |                                                                                                                                             | Proportion patients who are discussed at MDM at diagnosis            |
|    |                                                                                                                                             | Evaluation in a multi-disciplinary clinic prior to first treatment   |
|    |                                                                                                                                             | Evaluation in a MDM prior to first treatment                         |
|    |                                                                                                                                             | Case discussed at MDM that include a diagnostic radiologist          |
|    |                                                                                                                                             | MDM issued grade and stage statement (TNM)                           |
|    |                                                                                                                                             | Clear documentation of MDM discussion with all stakeholders          |
|    |                                                                                                                                             | Communication of tumour board consensus                              |

|    |                                                                                                                                                 |                                                                                                                       |
|----|-------------------------------------------------------------------------------------------------------------------------------------------------|-----------------------------------------------------------------------------------------------------------------------|
|    |                                                                                                                                                 | Proportion patients who are discussed at MDM with any new recurrence                                                  |
| 68 | Pathology involvement in MDM review is an important and measurable indicator of NET care quality                                                |                                                                                                                       |
| 69 | Which of the following measures of pathology involvement in MDM review is the most important indicator of NET care quality? Please choose one.  | Proportion discussed at a MDM that includes a pathologist                                                             |
|    |                                                                                                                                                 | Proportion of cases with histology reviewed by a NET expert pathologist"                                              |
| 70 | Which of the following measures of pathology involvement in MDM review is the most measurable indicator of NET care quality? Please choose one. | Review by a specialist gastrointestinal "GI" pathologist<br>Proportion discussed at a MDM that includes a pathologist |
|    |                                                                                                                                                 | Proportion of cases with histology reviewed by a NET expert pathologist                                               |
| 71 | Do you have any additional comments? (not required)                                                                                             | Review by a specialist gastrointestinal "GI" pathologist                                                              |
| 72 | The quality of pathology reports is an important and measurable indicator of NET care quality                                                   |                                                                                                                       |
| 73 | Which of the following pathology reporting measures are the most important indicators of NET care quality? Please choose three.                 | pTNM stage                                                                                                            |
|    |                                                                                                                                                 | Margin                                                                                                                |
|    |                                                                                                                                                 | Node                                                                                                                  |
|    |                                                                                                                                                 | Tumour size                                                                                                           |
|    |                                                                                                                                                 | Depth of invasion                                                                                                     |
|    |                                                                                                                                                 | Ki-67                                                                                                                 |
|    |                                                                                                                                                 | Mitotic rate                                                                                                          |
|    |                                                                                                                                                 | Grade                                                                                                                 |
|    |                                                                                                                                                 | IHC (synaptophysin/chromogranin)                                                                                      |
|    |                                                                                                                                                 | Necrosis                                                                                                              |
|    |                                                                                                                                                 | Differentiation                                                                                                       |
|    |                                                                                                                                                 | LVI                                                                                                                   |
|    |                                                                                                                                                 | Site                                                                                                                  |
| 74 | Which of the following pathology reporting measures are the most measurable indicators of NET care quality? Please choose three.                | pTNM stage                                                                                                            |
|    |                                                                                                                                                 | Margin                                                                                                                |
|    |                                                                                                                                                 | Node                                                                                                                  |
|    |                                                                                                                                                 | Tumour size                                                                                                           |
|    |                                                                                                                                                 | Depth of invasion                                                                                                     |
|    |                                                                                                                                                 | Ki-67                                                                                                                 |
|    |                                                                                                                                                 | Mitotic rate                                                                                                          |
|    |                                                                                                                                                 | Grade                                                                                                                 |
|    |                                                                                                                                                 | IHC (synaptophysin/chromogranin)                                                                                      |
|    |                                                                                                                                                 | Necrosis                                                                                                              |
|    |                                                                                                                                                 | Differentiation                                                                                                       |
|    |                                                                                                                                                 | LVI                                                                                                                   |
|    |                                                                                                                                                 | Site                                                                                                                  |
| 75 | Proportion of histopathology reports presented in a synoptic report is an important and measurable indicator of NET care quality                |                                                                                                                       |

|    |                                                                                                                                          |                                           |
|----|------------------------------------------------------------------------------------------------------------------------------------------|-------------------------------------------|
| 76 | Complete synoptic reporting to College of American Pathologists standards is an important and measurable indicator of NET care quality   |                                           |
| 77 | A comprehensive but non-synoptic report is an important and measurable indicator of NET care quality                                     |                                           |
| 78 | Do you have any additional comments? (not required)                                                                                      |                                           |
| 79 | Pathological classification based on ENETS staging is an important and measurable indicator of NET care quality                          |                                           |
| 80 | Proportion of NET patients with TNM staging at diagnosis is an important and measurable indicator of NET care quality                    |                                           |
| 81 | The use of which of the following TNM staging guidelines is the most important indicator of NET care quality? Please choose one.         | ENET guidelines                           |
|    |                                                                                                                                          | UICC guidelines                           |
| 82 | The use of which of the following TNM staging guidelines is the most measurable indicator of NET care quality? Please choose one.        | ENET guidelines                           |
|    |                                                                                                                                          | UICC guidelines                           |
| 83 | Do you have any additional comments? (not required)                                                                                      |                                           |
| 84 | Proportion of patients with functional imaging in staging is an important and measurable indicator of NET care quality                   |                                           |
| 85 | If staging functional imaging is used, the use of which scans are the most important indicators of NET care quality? Please choose two.  | Any peptide receptor imaging              |
|    |                                                                                                                                          | FDG scan                                  |
|    |                                                                                                                                          | Ga68 DOTA tate PET                        |
|    |                                                                                                                                          | Octreoscan                                |
| 86 | If staging functional imaging is used, the use of which scans are the most measurable indicators of NET care quality? Please choose two. | Any peptide receptor imaging              |
|    |                                                                                                                                          | FDG scan                                  |
|    |                                                                                                                                          | Ga68 DOTA tate PET                        |
|    |                                                                                                                                          | Octreoscan                                |
| 87 | Proportion patients with structural imaging is an important and measurable indicator of NET care quality                                 |                                           |
| 88 | If structural imaging is used, which of the following are the most important indicators of NET care quality? Please choose three.        | Contrast CT scan                          |
|    |                                                                                                                                          | Liver MRI                                 |
|    |                                                                                                                                          | Echocardiogram                            |
|    |                                                                                                                                          | Triphasic CT prior to surgical resection  |
|    |                                                                                                                                          | Triphasic MRI prior to surgical resection |
|    |                                                                                                                                          | Endoscopic Ultrasound                     |
| 89 | If structural imaging is used, which of the following are the most measurable indicators of NET care quality? Please choose three.       | Contrast CT scan                          |
|    |                                                                                                                                          | Liver MRI                                 |
|    |                                                                                                                                          | Echocardiogram                            |
|    |                                                                                                                                          | Triphasic CT prior to surgical resection  |
|    |                                                                                                                                          | Triphasic MRI prior to surgical resection |
|    |                                                                                                                                          | Endoscopic Ultrasound                     |
| 90 | Proportion of radiology synoptic reporting is an important and measurable indicator of NET care quality                                  |                                           |
| 91 | Time from diagnosis to completion of staging is an important and measurable indicator of NET care quality                                |                                           |
| 92 | Appropriate radiological staging is an important and measurable indicator of NET care quality                                            |                                           |
| 93 | Do you have any additional comments? (not required)                                                                                      |                                           |

|     |                                                                                                                                           |                                                           |
|-----|-------------------------------------------------------------------------------------------------------------------------------------------|-----------------------------------------------------------|
| 94  | Proportion who get biochemical functional workup is an important and measurable indicator of NET care quality                             |                                                           |
| 95  | If a biochemical workup is completed, which of the following are the most important indicators of NET care quality? Please choose three.  | CgA level                                                 |
|     |                                                                                                                                           | CgA with appropriate dietary restriction                  |
|     |                                                                                                                                           | 5HIAA level                                               |
|     |                                                                                                                                           | Urinary 5HIAA level with appropriate dietary restriction  |
|     |                                                                                                                                           | Calcium level                                             |
|     |                                                                                                                                           | pNETs baseline biochemistry                               |
|     |                                                                                                                                           | Appropriate biochemical staging                           |
|     |                                                                                                                                           | Ongoing biochemical monitoring                            |
|     |                                                                                                                                           | Proportion with functional status assessed (biochemistry) |
| 96  | If a biochemical workup is completed, which of the following are the most measurable indicators of NET care quality? Please choose three. | CgA level                                                 |
|     |                                                                                                                                           | CgA with appropriate dietary restriction                  |
|     |                                                                                                                                           | 5HIAA level                                               |
|     |                                                                                                                                           | Urinary 5HIAA level with appropriate dietary restriction  |
|     |                                                                                                                                           | Calcium level                                             |
|     |                                                                                                                                           | pNETs baseline biochemistry                               |
|     |                                                                                                                                           | Appropriate biochemical staging                           |
|     |                                                                                                                                           | Ongoing biochemical monitoring                            |
|     |                                                                                                                                           | Proportion with functional status assessed (biochemistry) |
| 97  | Do you have any additional comments? (not required)                                                                                       |                                                           |
| 98  | Recording of history is an important and measurable indicator of NET care quality                                                         |                                                           |
| 99  | If history is recorded, which of the following are the most important indicators of NET care quality? Please select three.                | Comprehensive history                                     |
|     |                                                                                                                                           | Family history                                            |
|     |                                                                                                                                           | Targeted family history                                   |
|     |                                                                                                                                           | Functional symptoms                                       |
|     |                                                                                                                                           | Comorbidities                                             |
|     |                                                                                                                                           | Weight loss                                               |
| 100 | If history is recorded, which of the following are the most measurable indicators of NET care quality? Please select three.               | Comprehensive history                                     |
|     |                                                                                                                                           | Family history                                            |
|     |                                                                                                                                           | Targeted family history                                   |
|     |                                                                                                                                           | Functional symptoms                                       |
|     |                                                                                                                                           | Comorbidities                                             |
|     |                                                                                                                                           | Weight loss                                               |
| 101 | Percent patients with clearly elicited and documented secretory symptoms is an important and measurable indicator of NET care quality     |                                                           |
| 102 | Comprehensive assessment of baseline symptoms and symptom history is an important and measurable indicator of NET care quality            |                                                           |
| 103 | Consideration of concurrent endocrine issues is an important and measurable indicator of NET care quality                                 |                                                           |
| 104 | Do you have any additional comments? (not required)                                                                                       |                                                           |
| 105 | Recording of clinical examination details is an important and measurable indicator of NET care quality                                    |                                                           |

|     |                                                                                                                                       |                                                                                   |
|-----|---------------------------------------------------------------------------------------------------------------------------------------|-----------------------------------------------------------------------------------|
| 106 | Which of the following examinations are the most important indicators of NET care quality? Please choose two.                         | ECOG                                                                              |
|     |                                                                                                                                       | Weight                                                                            |
|     |                                                                                                                                       | Cardiac examination                                                               |
|     |                                                                                                                                       | Comprehensive physical exam                                                       |
| 107 | Which of the following examinations are the most measurable indicators of NET care quality? Please choose two.                        | ECOG                                                                              |
|     |                                                                                                                                       | Weight                                                                            |
|     |                                                                                                                                       | Cardiac examination                                                               |
|     |                                                                                                                                       | Comprehensive physical exam                                                       |
| 108 | Do you have any additional comments? (not required)                                                                                   |                                                                                   |
| 109 | Type of presentation (e.g. incidental, symptoms, etc) is an important and measurable indicator of NET care quality                    |                                                                                   |
| 110 | Which of the following presentation types is the most important indicator of NET care quality? Please choose one.                     | Acute emergent presentation                                                       |
|     |                                                                                                                                       | CT as incidental finding                                                          |
|     |                                                                                                                                       | Familial screening or other screening programs (c-scope, g-scope)                 |
| 111 | Which of the following presentation types is the most measurable indicator of NET care quality? Please choose one.                    | Acute emergent presentation                                                       |
|     |                                                                                                                                       | CT as incidental finding                                                          |
|     |                                                                                                                                       | Familial screening or other screening programs (c-scope, g-scope)                 |
| 112 | Do you have any additional comments? (not required)                                                                                   |                                                                                   |
| 113 | Proportion of patients offered a clinical trial is an important and measurable indicator of NET care quality                          |                                                                                   |
| 114 | Proportion of patients entered into a clinical trial is an important and measurable indicator of NET care quality                     |                                                                                   |
| 115 | Proportion of patients whose tissue is banked is an important and measurable indicator of NET care quality                            |                                                                                   |
| 116 | Do you have any additional comments? (not required)                                                                                   |                                                                                   |
| 117 | All cases reported to national registry is an important and measurable indicator of NET care quality                                  |                                                                                   |
| 118 | Registry enrolment at diagnosis is an important and measurable indicator of NET care quality                                          |                                                                                   |
| 119 | Do you have any additional comments? (not required)                                                                                   |                                                                                   |
| 120 | The proportion of patients receiving systemic treatment is an important and measurable indicator of NET care quality                  |                                                                                   |
| 121 | Which of the following statements about systemic therapy are the most important indicators of NET care quality? Please choose three.  | Proportion of metastatic NET patients who are receiving targeted systemic therapy |
|     |                                                                                                                                       | Proportion of metastatic NET patients who are receiving chemotherapy              |
|     |                                                                                                                                       | Proportion of metastatic NET patients who are receiving PRRT                      |
|     |                                                                                                                                       | Proportion of metastatic NET patients who are receiving SSA                       |
|     |                                                                                                                                       | Proportion of patients who have had three or more lines of therapy                |
|     |                                                                                                                                       | Proportion of metastatic patients who receive 1st, 2nd, 3rd systemic therapy      |
|     |                                                                                                                                       | Proportion of patients with liver directed therapy                                |
|     |                                                                                                                                       | Proportion of patients with locoregional therapy                                  |
| 122 | Which of the following statements about systemic therapy are the most measurable indicators of NET care quality? Please choose three. | Proportion of metastatic NET patients who are receiving targeted systemic therapy |
|     |                                                                                                                                       | Proportion of metastatic NET patients who are receiving chemotherapy              |
|     |                                                                                                                                       | Proportion of metastatic NET patients who are receiving PRRT                      |

|     |                                                                                                                                                   |                                                                                           |
|-----|---------------------------------------------------------------------------------------------------------------------------------------------------|-------------------------------------------------------------------------------------------|
|     |                                                                                                                                                   | Proportion of metastatic NET patients who are receiving SSA                               |
|     |                                                                                                                                                   | Proportion of patients who have had three or more lines of therapy                        |
|     |                                                                                                                                                   | Proportion of metastatic patients who receive 1st, 2nd, 3rd systemic therapy              |
|     |                                                                                                                                                   | Proportion of patients with liver directed therapy                                        |
|     |                                                                                                                                                   | Proportion of patients with locoregional therapy                                          |
| 123 | Which of the following statements about choice of systemic therapy is the most important indicator of NET care quality? Please choose one.        | Proportion of patients with treatment by guideline                                        |
|     |                                                                                                                                                   | Proportion of patients who had access to proven therapy                                   |
|     |                                                                                                                                                   | Proportion of patients offered all globally proven therapies and analysed by each therapy |
| 124 | Which of the following statements about choice of systemic therapy is the most measurable indicator of NET care quality? Please choose one.       | Proportion of patients with treatment by guideline                                        |
|     |                                                                                                                                                   | Proportion of patients who had access to proven therapy                                   |
|     |                                                                                                                                                   | Proportion of patients offered all globally proven therapies and analysed by each therapy |
| 125 | Do you have any additional comments? (not required)                                                                                               |                                                                                           |
| 126 | Ongoing radiological monitoring is an important and measurable indicator of NET care quality                                                      |                                                                                           |
| 127 | Imaging events after curative surgery is an important and measurable indicator of NET care quality                                                |                                                                                           |
| 128 | Proportion of patients with bowel obstruction is an important and measurable indicator of NET care quality                                        |                                                                                           |
| 129 | Which time points are the most appropriate to measure this? Please choose three.                                                                  | At diagnosis                                                                              |
|     |                                                                                                                                                   | 1 year from diagnosis                                                                     |
|     |                                                                                                                                                   | 2 years from diagnosis                                                                    |
|     |                                                                                                                                                   | 3 years from diagnosis                                                                    |
|     |                                                                                                                                                   | 4 years from diagnosis                                                                    |
|     |                                                                                                                                                   | 5 years from diagnosis                                                                    |
|     |                                                                                                                                                   | 6 years from diagnosis                                                                    |
|     |                                                                                                                                                   | 7 years from diagnosis                                                                    |
|     |                                                                                                                                                   | 8 years from diagnosis                                                                    |
|     |                                                                                                                                                   | 9 years from diagnosis                                                                    |
|     |                                                                                                                                                   | 10 years from diagnosis                                                                   |
|     |                                                                                                                                                   | 15 years from diagnosis                                                                   |
|     |                                                                                                                                                   | 20 years from diagnosis                                                                   |
| 130 | Do you have any additional comments? (not required)                                                                                               |                                                                                           |
| 131 | The proportion of patients who have unknown primary site of disease is an important and measurable indicator of NET care quality                  |                                                                                           |
| 132 | Proportion of patients diagnosed by each specialty is an important and measurable indicator of NET care quality                                   |                                                                                           |
| 133 | Proportion of patients with metastases at initial diagnosis is an important and measurable indicator of NET care quality                          |                                                                                           |
| 134 | Do you have any additional comments? (not required)                                                                                               |                                                                                           |
| 135 | Thank you very much for the time taken to complete this survey, your input is greatly appreciated! Do you have any final comments? (not required) |                                                                                           |

### Supplementary Material 5: Weighted score

Participants were asked to rate appropriateness statements on a Likert scale of 1 = Highly inappropriate to 9 = Highly appropriate (5 = Uncertain).

| Rating score | Weighted multiplier |
|--------------|---------------------|
| 1            | -4                  |
| 2            | -3                  |
| 3            | -2                  |
| 4            | -1                  |
| 5            | 0                   |
| 6            | 1                   |
| 7            | 2                   |
| 8            | 3                   |
| 9            | 4                   |

Each score was weighted based on the number of responses; weighted multiplier \* number of responses = weighted value.

The positive weighted values (corresponding to rating score of 6-9) were summed and divided by the number of responses.

To adjust for the total number of responses, this was multiplied by the ratio of positive (rating score 6-9): total number of responses, excluding uncertain ratings ("5").

Using a weighted average gave a sense of the level of agreement within the group, i.e. whether there were a high number of both high and low ratings, or whether there was strong consensus for an average rating.

## **Supplementary Material 6: Round 2 – modified RAND/UCLA Delphi Consensus expert group ranking**

As required by the modified Delphi method, a small expert group (see Supplementary Material 2.3) met to discuss appropriateness statements that had been top ranked in the Round 1 survey, and select a subset of final indicators by consensus. A reading pack had been distributed that included a reminder of the background to the project, methods of analysis and data presentation, and a summary of results for all statements. The summary included a single bar chart for each statement showing the weighted appropriateness, with the positive and negative response presented separately for each statement. Round 1 responder comments from free-text survey fields were presented next to each relevant statement.

It was affirmed that disagreement was acceptable, the group was not forced to agree, but only statements with consensus would progress as NET QPIs. The videoconference was recorded by ZOOM, transcribed and combined with notes from three people taken during the meeting (KP, BL, BW). Following the meeting, a rating form was circulated online for ranking the draft indicators (n=16) by the expert group as appropriate, uncertain, or inappropriate. Each indicator was presented alongside the relevant discussion points raised during the teleconference. A comment field was offered after every indicator to ensure the working group were able to communicate their opinion clearly and ensure accurate feedback was received on the proposed indicator list. Final NET QPIs were chosen using a consensus threshold of 80%, as utilised in the previous CommNETs Delphi process.



## Supplementary Material 7: Round 1 results index

Asterisk (\*) indicates statements which were followed by sub-statements in a checkbox format.

| Appropriateness<br>Statement<br>Number | Statement                                                                 |
|----------------------------------------|---------------------------------------------------------------------------|
| Q72.                                   | The quality of pathology reports*                                         |
| Q16.                                   | Patient reported quality of life*                                         |
| Q68.                                   | Pathology involvement in MDM review*                                      |
| Q65.                                   | MDM review*                                                               |
| Q87.                                   | Proportion patients with structural imaging*                              |
| Q92.                                   | Appropriate radiological staging                                          |
| Q84.                                   | Proportion of patients with functional imaging in staging*                |
| Q75.                                   | Proportion of histopathology reports presented in a synoptic report       |
| Q10.                                   | Survival after diagnosis*                                                 |
| Q101.                                  | Percent patients with clearly elicited and documented secretory symptoms  |
| Q117.                                  | All cases reported to national registry                                   |
| Q63.                                   | Proportion of patients who see who see a NET specialist                   |
| Q118.                                  | Registry enrolment at diagnosis                                           |
| Q126.                                  | Ongoing radiological monitoring                                           |
| Q76.                                   | Complete synoptic reporting to College of American Pathologists standards |
| Q25.                                   | Measurement of quality of life*                                           |
| Q29.                                   | Proportion of patients with functional symptom control                    |
| Q102.                                  | Comprehensive assessment of baseline symptoms and symptom history         |
| Q33.                                   | Proportion of carcinoid patients who have cardiac imaging*                |
| Q94.                                   | Proportion who get biochemical functional workup*                         |
| Q98.                                   | Recording of history*                                                     |
| Q54.                                   | Assessment of surgical quality*                                           |
| Q79.                                   | Pathological classification based on ENETS staging                        |
| Q61.                                   | Complete post-operative TNM staging                                       |
| Q14.                                   | Documentation of cause of death for patients who die from NETs            |
| Q60.                                   | Complete pre-operative TNM staging                                        |
| Q90.                                   | Proportion of radiology synoptic reporting                                |
| Q103.                                  | Consideration of concurrent endocrine issues                              |

|       |                                                                                                      |
|-------|------------------------------------------------------------------------------------------------------|
| Q127. | Imaging events after curative surgery                                                                |
| Q57.  | The quality of pre-operative assessment*                                                             |
| Q32.  | Proportion of NET patients diagnosed with carcinoid heart disease (using echocardiogram)             |
| Q80.  | Proportion of NET patients with TNM staging at diagnosis*                                            |
| Q45.  | The time interval from first doctors visit with symptoms of NET, to diagnosis of NET*                |
| Q120. | The proportion of patients receiving systemic treatment*                                             |
| Q113. | Proportion of patients offered a clinical trial                                                      |
| Q40.  | Proportion of patients offered patient support groups                                                |
| Q91.  | Time from diagnosis to completion of staging                                                         |
| Q49.  | Proportion of patients with surgical consultation for consideration of resection                     |
| Q64.  | Review by specialist (by any means including virtual review) at least annually                       |
| Q38.  | Proportion of patients receiving a treatment summary                                                 |
| Q133. | Proportion of patients with metastases at initial diagnosis                                          |
| Q28.  | Proportion of patients who report they are NET symptom-free at 18 months using symptom questionnaire |
| Q30.  | Proportion of patients with non-functional symptom control                                           |
| Q39.  | Proportion of patients offered allied health services                                                |
| Q37.  | Proportion of patients receiving a care plan                                                         |
| Q51.  | Proportion of patients who receive surgery with curative intent                                      |
| Q36.  | Proportion of patients receiving a needs assessment                                                  |
| Q114. | Proportion of patients entered into a clinical trial                                                 |
| Q105. | Recording of clinical examination details*                                                           |
| Q42.  | The time interval until treatment is started*                                                        |
| Q20.  | Surrogates for quality of life are important and measurable indicators of NET care quality*          |
| Q115. | Proportion of patients whose tissue is banked                                                        |
| Q128. | Proportion of patients with bowel obstruction*                                                       |
| Q52.  | Proportion patients who receive non-curative surgery                                                 |
| Q131. | The proportion of patients who have unknown primary site of disease                                  |
| Q109. | Type of presentation (e.g. incidental, symptoms, etc)*                                               |
| Q50.  | Proportion of patients getting resection                                                             |
| Q77.  | A comprehensive but non-synoptic report                                                              |
| Q132. | Proportion of patients diagnosed by each specialty                                                   |

---
